# Supplementary material
Source: PubMed Central journal article supplement (PMC3574935)
Supplement: 1222470110_pnas.201222470SI.pdf [file 1222470110_pnas.201222470SI.pdf]

# Supporting Information

Lee et al. 10.1073/pnas.1222470110

## SI Results and Discussion

From Fig. 2B, we found that there is no significant interaction force (neither adhesive nor repulsive) between cartilage against cartilage. Using the Hertz theory (1), the contact radius  $a$  can be calculated by  $a^3 = RL/K$ , where  $R$  and  $K$  are radius of the curvature (1–2 cm) and stiffness of the cartilage (4–10 MPa) (2),

respectively. Moreover, average pressure  $P_{av}$  can be calculated by  $P_{av} = L/\pi a^2$ , leading to

$$P_{av} = \frac{L^{1/3}K^{2/3}}{\pi R^{2/3}}, \quad [S1]$$

which was around 0.02–0.2 MPa for the performed experiments.

1. Israelachvili JN (2010) *Intermolecular and Surface Forces* (Academic and Elsevier, Amsterdam), 3rd Ed.
2. Swann AC, Seedhom BB (1993) The stiffness of normal articular cartilage and the predominant acting stress levels: Implications for the aetiology of osteoarthritis. *Br J Rheumatol* 32(1):16–25.

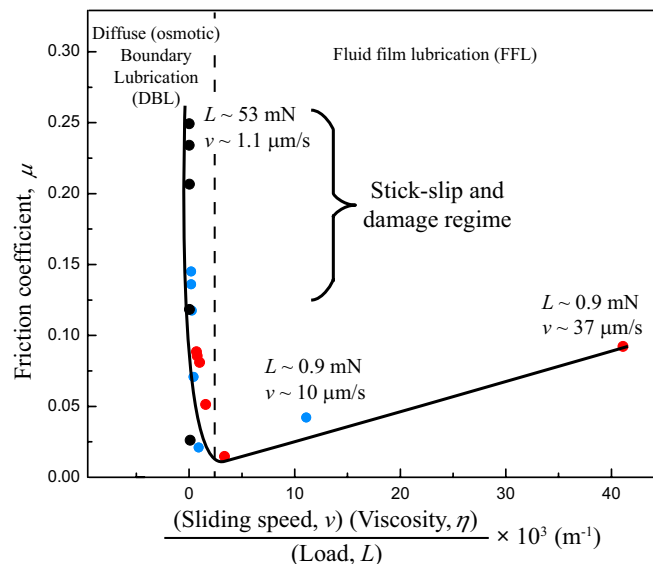

Fig. S1. Conventional Stribeck curve plotted with the data from Fig. 2B. Viscosity is assumed as constant ( $\eta = 0.1$  pa·s, 100 times bulk water).

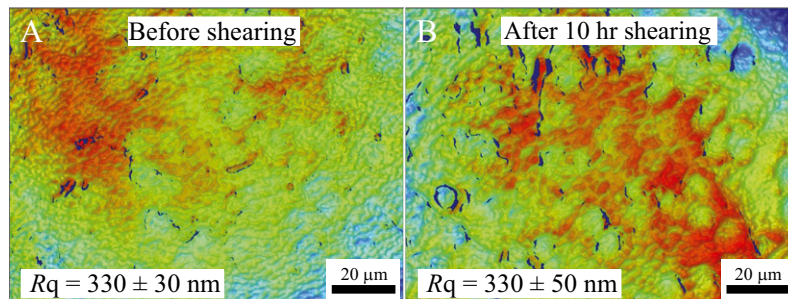

Fig. S2. Topographic images (top view) of the contact zone of normal (nondigested) cartilage (A) before and (B) after 10 h shearing in nonstick-slip regime. Red and blue colors indicate higher and lower heights, respectively.
